# Supplementary material
Source: PubMed Central journal article supplement (PMC3748482)
Supplement: SD1.pdf [file SD1.pdf]

SUPPLEMENTAL TABLE 1

Univariate logistic regression analyses of the odds of re-infection with *Ascaris lumbricoides* at 4- and 6-month follow-up among the 99 triple-dose albendazole-treated children from Yunnan, P.R. China, from October 2011 to May 2012

|                                                             | 4-month follow-up                    |                    | 6-month follow-up                    |                    |
|-------------------------------------------------------------|--------------------------------------|--------------------|--------------------------------------|--------------------|
|                                                             | n <sub>r</sub> /n <sub>i</sub> * (%) | OR (95% CI)†       | n <sub>r</sub> /n <sub>i</sub> * (%) | OR (95% CI)†       |
| Baseline infection with <i>Ascaris lumbricoides</i>         |                                      |                    |                                      |                    |
| Non-infected                                                | 3/5 (60.0)                           | 1.00               | 4/5 (80.0)                           | 1.00               |
| Infected                                                    | 72/94 (76.6)                         | 2.18 (0.34–13.90)  | 79/94 (84.0)                         | 1.32 (0.14–12.61)  |
| Baseline infection with <i>Trichuris trichiura</i>          |                                      |                    |                                      |                    |
| Non-infected                                                | 4/7 (57.1)                           | 1.00               | 5/7 (71.4)                           | 1.00               |
| Infected                                                    | 71/92 (77.2)                         | 2.54 (0.53–12.24)  | 78/92 (84.8)                         | 2.23 (0.39–12.64)  |
| Baseline infection with hookworm                            |                                      |                    |                                      |                    |
| Non-infected                                                | 30/39 (76.9)                         | 1.00               | 34/39 (87.2)                         | 1.00               |
| Infected                                                    | 45/60 (75.0)                         | 0.90 (0.35–2.32)   | 49/60 (81.7)                         | 0.66 (0.21–2.06)   |
| Baseline infection intensity of <i>Ascaris lumbricoides</i> |                                      |                    |                                      |                    |
| Non-infected                                                | 3/5 (60.0)                           | 1.00               | 4/5 (80.0)                           | 1.00               |
| Light                                                       | 9/13 (69.2)                          | 1.50 (0.18–12.78)  | 10/13 (76.9)                         | 0.83 (0.07–10.60)  |
| Moderate                                                    | 38/54 (70.4)                         | 1.58 (0.24–10.40)  | 43/54 (79.6)                         | 0.98 (0.10–9.64)   |
| Heavy                                                       | 25/27 (92.6)                         | 8.33 (0.84–82.86)  | 26/27 (96.3)                         | 6.50 (0.34–126.06) |
| Baseline level of multiparasitism                           |                                      |                    |                                      |                    |
| Single species                                              | 5/7 (71.4)                           | 1.00               | 6/7 (85.7)                           | 1.00               |
| Double species                                              | 27/37 (73.0)                         | 1.08 (0.18–6.49)   | 31/37 (83.8)                         | 0.86 (0.09–8.51)   |
| Triple species                                              | 43/55 (78.2)                         | 1.43 (0.25–8.33)   | 46/55 (83.6)                         | 0.85 (0.09–7.96)   |
| Age‡                                                        | n.a.                                 | 0.81 (0.55–1.19)   | n.a.                                 | 0.84 (0.55–1.29)   |
| Sex                                                         |                                      |                    |                                      |                    |
| Male                                                        | 36/46 (78.3)                         | 1.00               | 37/46 (80.4)                         | 1.00               |
| Female                                                      | 39/53 (73.6)                         | 0.77 (0.31–1.96)   | 46/53 (86.8)                         | 1.60 (0.54–4.70)   |
| Village                                                     |                                      |                    |                                      |                    |
| Kongkan                                                     | 22/35 (62.9)                         | 1.00               | 24/35 (68.6)                         | 1.00               |
| Sandui                                                      | 25/28 (89.3)                         | 4.92 (1.24–19.57)§ | 28/28 (100.0)                        | n.a.¶              |
| Laozhai                                                     | 19/22 (86.4)                         | 3.74 (0.93–15.14)§ | 20/22 (90.9)                         | 4.58 (0.91–23.14)§ |
| Laonandong                                                  | 4/6 (66.7)                           | 1.18 (0.19–7.37)   | 5/6 (83.3)                           | 2.29 (0.24–22.02)  |
| Mannuo                                                      | 5/8 (62.5)                           | 0.98 (0.20–4.82)   | 6/8 (75.0)                           | 1.38 (0.24–7.93)   |

\*n<sub>r</sub>/n<sub>i</sub> = number of individuals re-infected/total number of individuals in stratum.

†All values are odds ratio, with 95% confidence intervals (CI) in brackets, and all *P*-values are calculated from the likelihood ratio test.

‡Age in years at the point of follow-up as a numeric variable.

§*P*-value < 0.05.

¶All children in Sandui were re-infected during the final follow-up.

n.a. = not applicable.
